# Supplementary material for: HESS Opinions "Topography driven conceptual modelling (FLEX-Topo)"
Source: Copernicus journal article supplement (doi:10.5194/hess-14-2681-2010), 2010-12-23
Supplement: Supplementary file 1 [file hess-14-2681-2010-supplement.pdf]

Supplement to “Topography driven conceptual modelling (FLEX-Topo)” by H. H. G. Savenije

The HAND methodology which is a crucial element of the FLEX-Topo methodology is based on work by Antonio Donato Nobre et al. on:  
"Height Above the Nearest Drainage (HAND), a hydrologically relevant new terrain model".

This work can be accessed through:

[http://www.dsr.inpe.br/~anobre/Nobre\\_et\\_al\\_HAND.pdf](http://www.dsr.inpe.br/~anobre/Nobre_et_al_HAND.pdf)
